# Supplementary material for: Technological variability at Sibudu Cave: The end of Howiesons Poort and reduced mobility strategies after 62,000 years ago
Source: PLoS One. 2017 Oct 5;12(10):e0185845. doi: 10.1371/journal.pone.0185845 (PMC5628897; doi:10.1371/journal.pone.0185845)
Supplement: S1 Table — (XLSX) [file pone.0185845.s003.xlsx]

## Sheet: Sheet1
	GS	GR	RB	BYA2 (i)	YA2 (i)	BYA2	Mottled Grey YA2	YA2	BYA	YA
Main rock type Dolerite	?	Y	Y	Y	N	N	N	Y	Y	Y
Main rock type Hornfels	?	N	N	N	N	N	N	N	N	N
Main rock type Quartz	?	N	N	N	Y	N	N	N	N	N
Main rock type Quartzite	?	N	N	N	N	Y	Y	N	N	N
Main rock type Sandstone	?	N	N	N	N	Y	N	N	N	N
Second most important rock type Dolerite	?	N	N	N	Y	Y	Y	N	N	N
Second most important rock type Hornfels	?	Y	Y	N	N	N	N	N	N	N
Second most important rock type Quartz	?	N	N	Y	N	N	N	Y	Y	Y
Second most important rock type Quartzite	?	N	N	N	N	N	N	N	N	N
Second most important rock type Sandstone	?	N	N	N	N	N	N	N	N	N
Main retouched rock type Dolerite	N	N	Y	N	N	Y	Y	N	N	N
Main retouched rock type Hornfels	N	N	N	N	N	Y	N	Y	N	Y
Main retouched rock type Quartz	Y	Y	N	Y	Y	N	N	N	Y	N
Main retouched rock type Quartzite	N	N	N	N	Y	N	Y	N	N	N
Presence of knapping of CCS	?	Y	N	N	N	N	N	N	N	N
Presence of knapping in crystal quartz	Y	Y	N	N	N	N	N	N	N	Y
Presence of knapping of other raw materials that are not hornfels, dolerite, quartzite	N	N	N	Y	Y	N	N	Y	Y
Presence of centripetal or multifacial cores dolerite	N	Y	N	N	N	N	N	Y	N	Y
Presence of centripetal or multifacial cores hornfels	Y	Y	N	N	N	N	N	Y	N	N
Presence of centripetal or multifacial cores quartz	Y	N	N	Y	Y	N	N	Y	Y	N
Presence of bladelet cores hornfels	Y	Y	N	N	N	N	N	N	N	N
Presence of bladelet cores quartzite	N	N	N	N	N	N	N	N	N	N
Presence of bladelet cores quartz	N	Y	N	Y	N	N	N	N	N	N
Presence of prismatic blade cores hornfels	Y	Y	N	N	N	N	N	N	N	N
Presence of prismatic blade cores dolerite	Y	Y	N	N	N	N	N	N	N	N
Presence of core on flake hornfels	Y	Y	Y	N	N	N	N	N	N	N
Presence of core on flake dolerite	Y	Y	N	N	N	Y	N	N	N	N
Presence of bipolar cores quartz	Y	Y	N	N	N	N	N	N	N	N
Presence of bipolar cores quartzite	N	Y	Y	Y	Y	Y	Y	Y	Y	N
Presence of HP cores hornfels	Y	Y	N	N	N	N	N	N	N	N
Presence of prismatic blades dolerite	Y	Y	Y	Y	Y	Y	Y	Y	Y	Y
Presence of prismatic blades hornfels	Y	Y	Y	Y	Y	N	Y	Y	Y	Y
Presence of prismatic blades quartz	?	N	N	N	Y	N	N	N	Y	N
Presence of Levallois flakes dolerite or hornfels	N	Y	N	N	N	N	N	N	N	N
Presence of discoidal flakes (pseudolevallois flakes, edge of the core) dolerite	?	Y	N	N	N	N	N	N	Y	Y
Presence of discoidal flakes (pseudolevallois flakes, edge of the core) hornfels	?	?	N	N	N	N	N	N	N	Y
Presence of discoidal flakes (pseudolevallois flakes, edge of the core) quartz	?	N	N	?	Y	N	N	N	N	Y
Presence of discoidal flakes (pseudolevallois flakes, edge of the core) quartzite	N	N	N	N	N	N	N	N	N	Y
Presence of bladelets dolerite	Y	Y	N	?	N	N	N	Y	N	Y
Presence of bladelets hornfels	Y	Y	Y	?	Y	N	N	Y	N	Y
Presence of bladelets quartzite	N	N	N	?	N	N	Y	N	N	N
Presence of bladelets quartz	Y	Y	N	?	Y	Y	N	N	Y	N
Presence of crests or semicrests	Y	Y	N	N	N	N	N	N	N	N
Presence of false semicrest (change in the direction of knapping)	Y	Y	Y	Y	Y	N	N	Y	N	N
Presence of autonomous flake production in dolerite	?	Y	?	?	Y	?	?	Y	Y	Y
Presence of autonomous flake production in hornfels	?	Y	?	?	?	?	?	N	N	Y
Presence of autonomous flake production in quartz	?	N	?	Y	Y	?	?	Y	Y	Y
Presence of autonomous flake production in quartzite	N	N	?	?	?	Y	Y	Y	Y	Y
Presence of autonomous flake production in sandstone	?	Y	?	?	Y	Y	?	Y	?	?
Presence of bifacial reduction (resharpening flakes, accidents)	Y	Y	N	Y	N	N	N	N	N	N
Presence of recycling from freehand quartz cores to bipolar cores	Y	Y	N	N	N	N	N	N	N	N
Dolerite: dominance of unidirectional scar pattern for flakes	?	Y	Y	N	Y	Y	?	Y	N	N
Dolerite: dominance of centripetal subcentripetal scar pattern for flakes	?	N	N	Y	N	N	?	N	Y	Y
Dolerite: dominance of expanding shapes	?	Y	N	Y	N	N	Y	Y	Y	Y
Dolerite: dominance of parallel shapes	?	N	Y	N	Y	Y	N	Y	N	N
Presence of backed pieces	Y	Y	Y	Y	N	N	Y	Y	N	Y
Preference on blades for retouched blanks	Y	Y	N	N	N	N	?	Y	?	N
Preference on flakes for retouched blanks	N	N	Y	Y	Y	N	?	N	?	Y
Presence of bifacial pieces	Y	Y	N	Y	Y	N	N	N	Y	N
Presence of big notches	Y	Y	N	N	Y	N	N	Y	N	Y
Dominance of backed pieces	Y	Y	N	N	N	N	?	N	N	N
Dominance of bifacial pieces	N	N	N	Y	N	N	?	N	N	N
Dominance of other types	N	N	Y	N	N	Y	?	Y	N	Y
Presence of grindstones rubber stones	N	N	N	N	N	N	Y	Y	Y	Y
